# Supplementary material for: A chemically and mechanically stable dual-phase membrane with high oxygen permeation flux
Source: Royal Society of Chemistry journal article supplement (doi:10.1039/d0ta07680e), 2020-01-01
Supplement: d0ta07680e1.pdf [file d0ta07680e1.pdf]

## Supplementary Information

### **Chemically and mechanically stable dual-phase membrane with high oxygen permeation flux**

Gyeong Duk Nam<sup>a</sup>, Gahyeon Lee<sup>a</sup>, Soomin Choi<sup>a</sup>, Jinsil Lee<sup>a</sup>, Sun-Ju Song<sup>b\*</sup>, and Jong Hoon Joo<sup>a\*</sup>

<sup>a</sup> Department of Advanced Material Engineering, Chungbuk National University, 1Chungdae-ro, Seowon-gu, Cheongju, Chungbuk 28644, (Republic of Korea)

<sup>b</sup> School of Material Science and Engineering, Chonnam National University, 77 Yongbong-ro, Buk-gu, Gwangju 61186, (Republic of Korea)

\*The corresponding authors, E-mail: [song@chonnam.ac.kr](mailto:song@chonnam.ac.kr), [jhjo@chungbuk.ac.kr](mailto:jhjo@chungbuk.ac.kr),

[jonghoonjoo@gmail.com](mailto:jonghoonjoo@gmail.com)

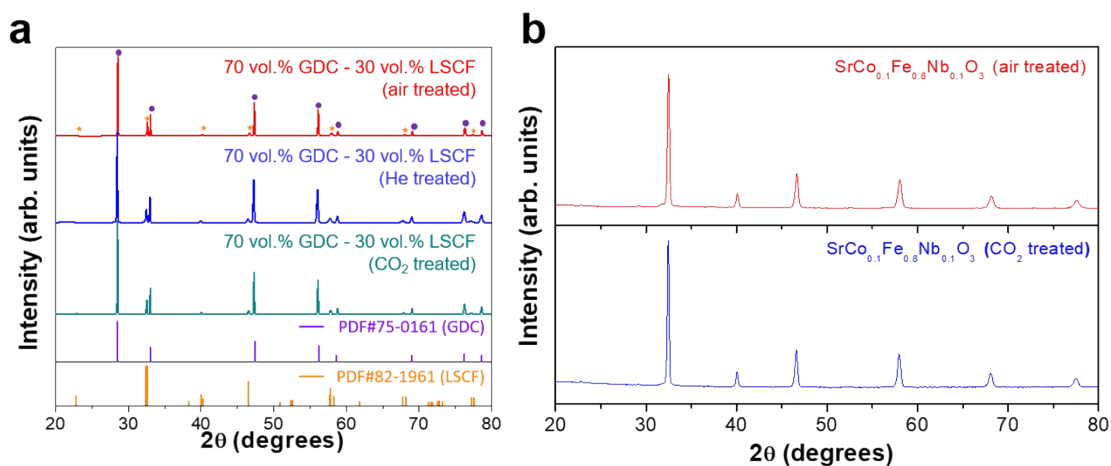

**Fig. S1** XRD patterns of GDC/LSCF and SCFN. a) XRD patterns of GDC/LSCF after the aging under operating conditions (air, He,  $\text{CO}_2$ ) at 850 °C for 50 h. b) XRD patterns of SCFN before and after aging under air and  $\text{CO}_2$  at 850 °C for 50 h.

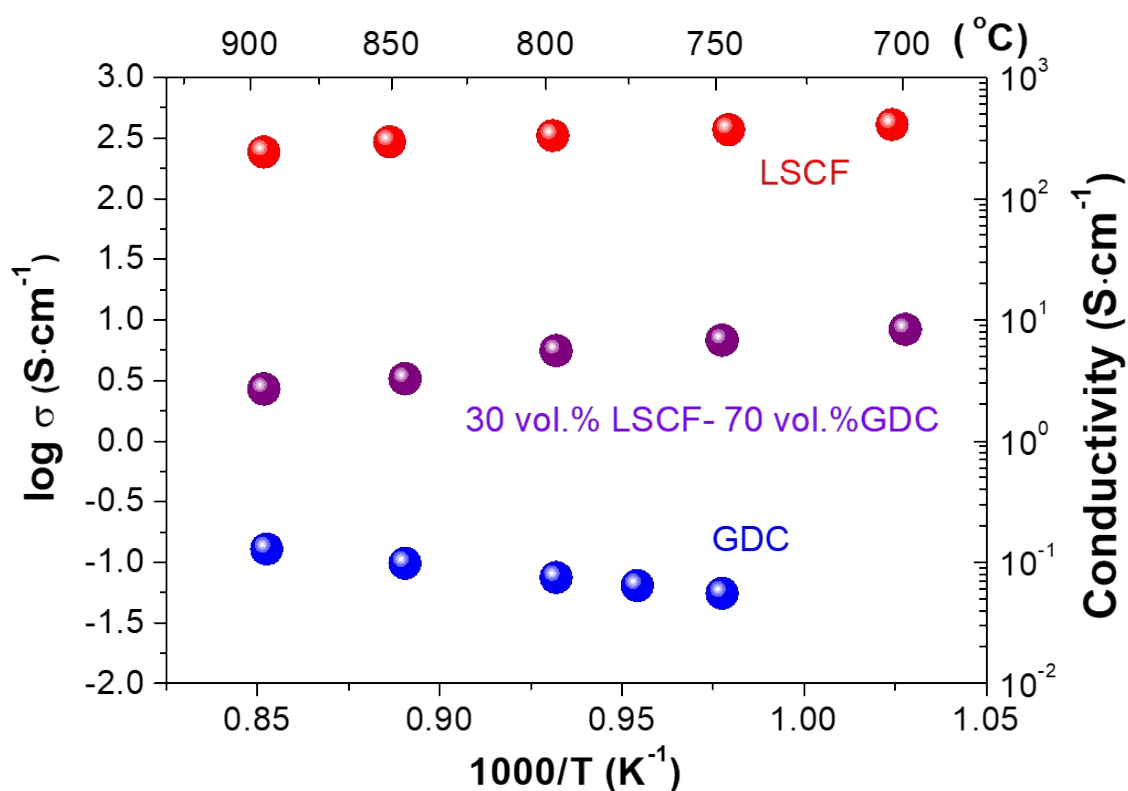

**Fig. S2** Electrical conductivities of LSCF, GDC, and GDC/LSCF (70 vol.% GDC/30 vol.% LSCF)

In order to obtain the optimized oxygen flux, it is desirable to design the dual-phase membrane with two continuously distributed phases: an ionic-conducting phase and an electronic-conducting phase. In the previous our study, 20 vol.% of LSCF guaranteed electrical percolation in the GDC/LSCF membrane. However, in this study, to ensure the electronic conduction, the content of LSCF phase was increased to 30 vol.%. As shown in Supplementary Information (Fig. S2), the LSCF, GDC, and GDC/LSCF composite represent the conductivities of 242, 0.129, and 2.69 S·cm<sup>-1</sup> at 900 °C. Considering that the electrical conductivity of GDC/LSCF (2.69 S·cm<sup>-1</sup> at 900 °C) is more than 20 times larger than that of GDC (0.129 S·cm<sup>-1</sup> at 900 °C), it can be confirmed that 30 vol.% of LSCF is certainly electronically percolated to GDC phase.

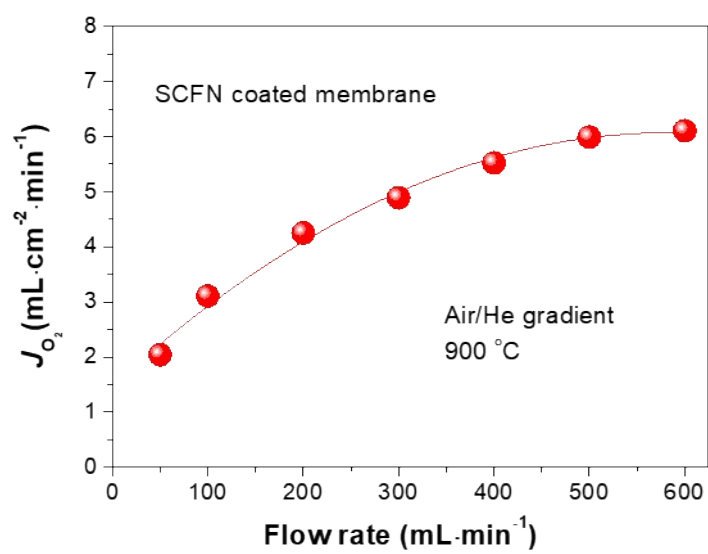

**Fig. S3** Oxygen permeation flux of the SCFN-coated membrane as a function of the gas flow rate.
